# Supplementary material for: Antioxidant and Cytotoxic Activity of a New Ferruginan A from Olea ferruginea: In Vitro and In Silico Studies
Source: Oxid Med Cell Longev. 2022 Jan 20;2022:8519250. doi: 10.1155/2022/8519250 (PMC8794655; doi:10.1155/2022/8519250)
Supplement: Supplementary Materials — Spectroscopic data related to isolated compounds 1–3 are available online. [file 8519250.f1.docx]

**Antioxidant and cytotoxic activity of a new Ferruginan A from *Olea ferruginea: in vitro* and in Silico Studies**

Zafar Ali Shaha, Adil A.H. Mujawahb, Irfan Ullaha, Abdur Rauf *a, Umer Rashidc, Anees Ahmed Khalild, Syed Muhammad Mukaram Shahe, Aini Pervaize, Farzana Shaheenf,Yahya S. Al-Awthang,h, Muhammad Nasimullah Qureshia, Mohammed A. Al-Duaisi,j, Omar Bahattabg,Zainab M. Almarhoonk, Yahia N. Mabkhotl, Mohammad S. Mubarakm

aDepartment of Chemistry, University of Swabi, Swabi-23430, Khyber Pakhtunkhwa, Pakistan.

bDepartment of Chemistry, College of Science and Arts, Qassim University, Ar Rass, 51921, Saudi Arabia

cDepartment of Chemistry, COMSATS University Islamabad, Abbottabad Campus, 22060 Abbottabad, Pakistan

dUniversity Institute of Diet and Nutritional Sciences, Faculty of Allied Health Sciences, The University of Lahore, Pakistan

eDepartment of Pharmacy, University of Swabi, Swabi-23430, Khyber Pakhtunkhwa, Pakistan.

fH.E.J. Research Institute of Chemistry, International Center for Chemical and Biological Sciences, University of Karachi, Karachi, Pakistan

gDepartment of Biology, Faculty of Science. University of Tabuk, Tabuk, Saudi Arabia

hDepartment of Biology, Faculty of Science, Ibb University, Ibb, Yemen

iDepartment of Biochemistry, Faculty of Science, University of Tabuk, Tabuk, Saudi Arabia

jBiochemistry Unit, Chemistry Department, Faculty of Science, Ibb University, Ibb, Yemen

kDepartment of Chemistry, College of Science, King Saud University, P.O. Box 2455, Riyadh 11451, Saudi Arabia

lDepartment of Pharmaceutical Chemistry, College of Pharmacy, King Khalid University, Abha, Saudi Arabia

mDepartment of Chemistry, University of Jordan, Amman 11942, Jordan

.

***Corresponding author:** [abdurrauf@uoswabi.edu.pk](mailto:abdurrauf@uoswabi.edu.pk)

**Spectroscopic study of compounds (1-3)**

| No. | Name of Spectra | Page No. |
| --- | --- | --- |
| 1 | FAB-MS spectra of compound **1** | 2 |
| 2 | HRFAB-MS spectra of compound **1** | 2 |
| 3 | 1H-NMR spectra of compound **1** | 3 |
| 4 | 13C-NMR spectra of compound **1** | 3 |
| 5 | HSQC spectra of compound **1** | 4 |
| 6 | HMBC spectra of compound **1** | 4 |
| 7 | COSY spectra of compound **1** | 5 |
| 8 | EI-MS spectra of compound **2** | 5 |
| 9 | 1H-NMR spectra of compound **2** | 6 |
| 10 | EI-MS spectra of compound **3** | 6 |
| 11 | 1H-NMR spectra of compound **3** | 7 |


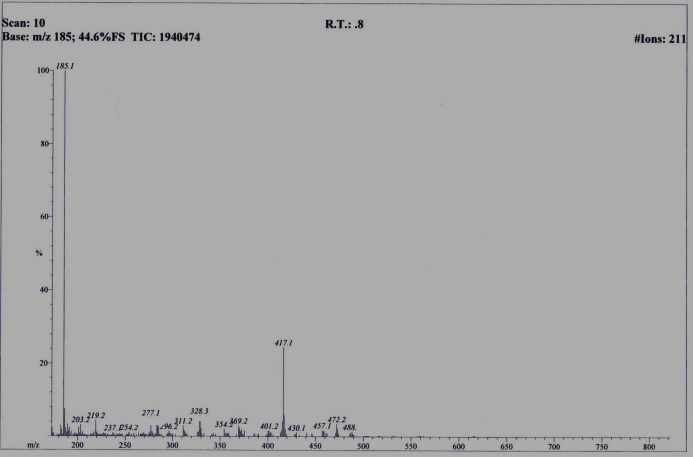


Figure-S1: FAB-MS spectra of compound **1**


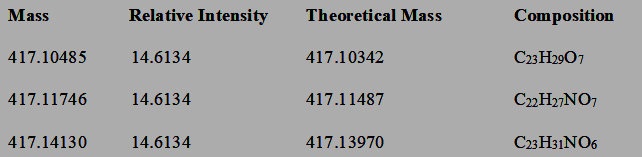


Figure-S2: HRFAB-MS spectra of compound **1**


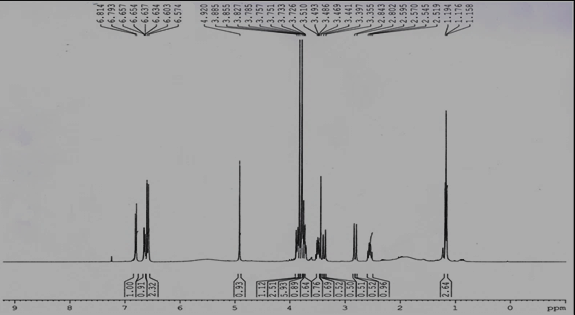


Figure-S3: 1H-NMR spectra of compound **1**


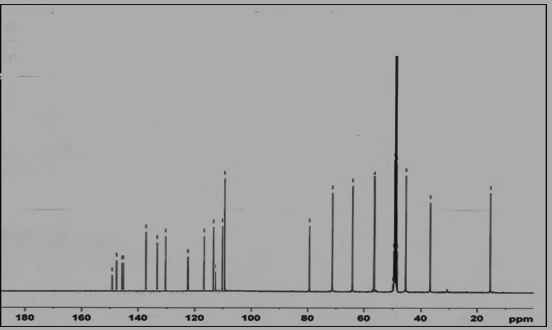


Figure-S4: 13C-NMR spectra of compound **1**


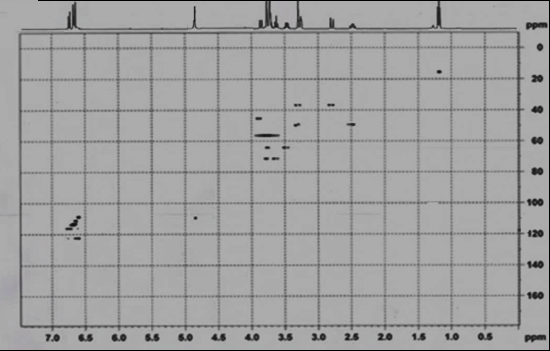


Figure-S5: HSQC spectra of compound **1**


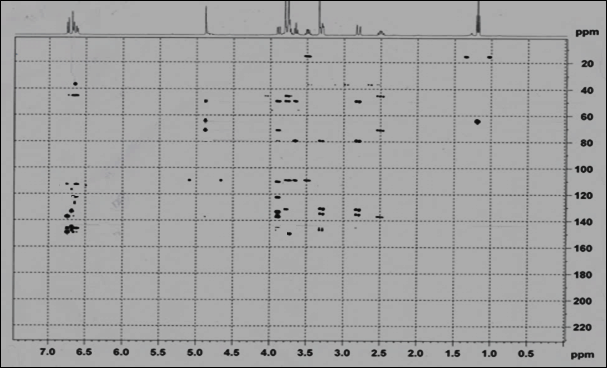


Figure-S6 HMBC spectra of compound **1**


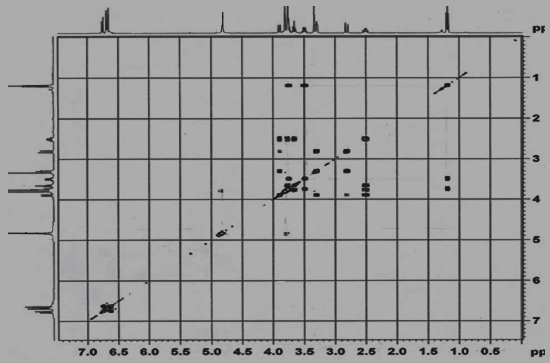


Figure-S7: COSY spectra of compound **1**

Figure-S8: EI-MS spectra of compound **2**


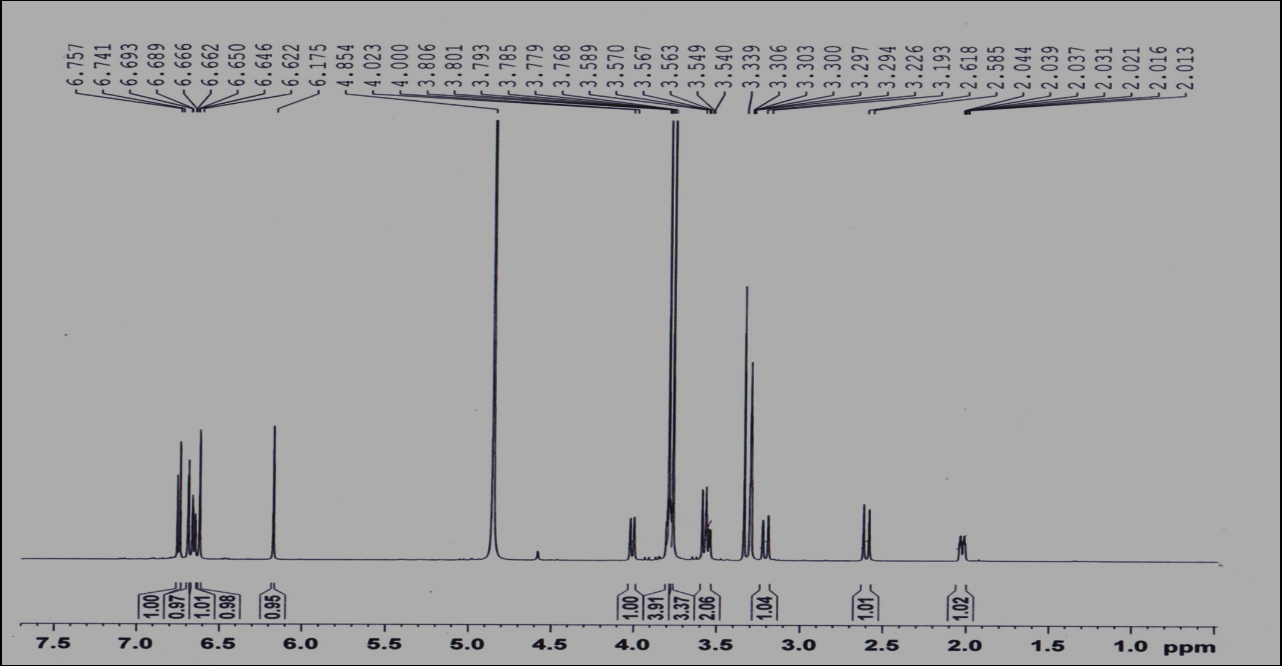


Figure-S9: 1H-NMR spectra of compound **2**


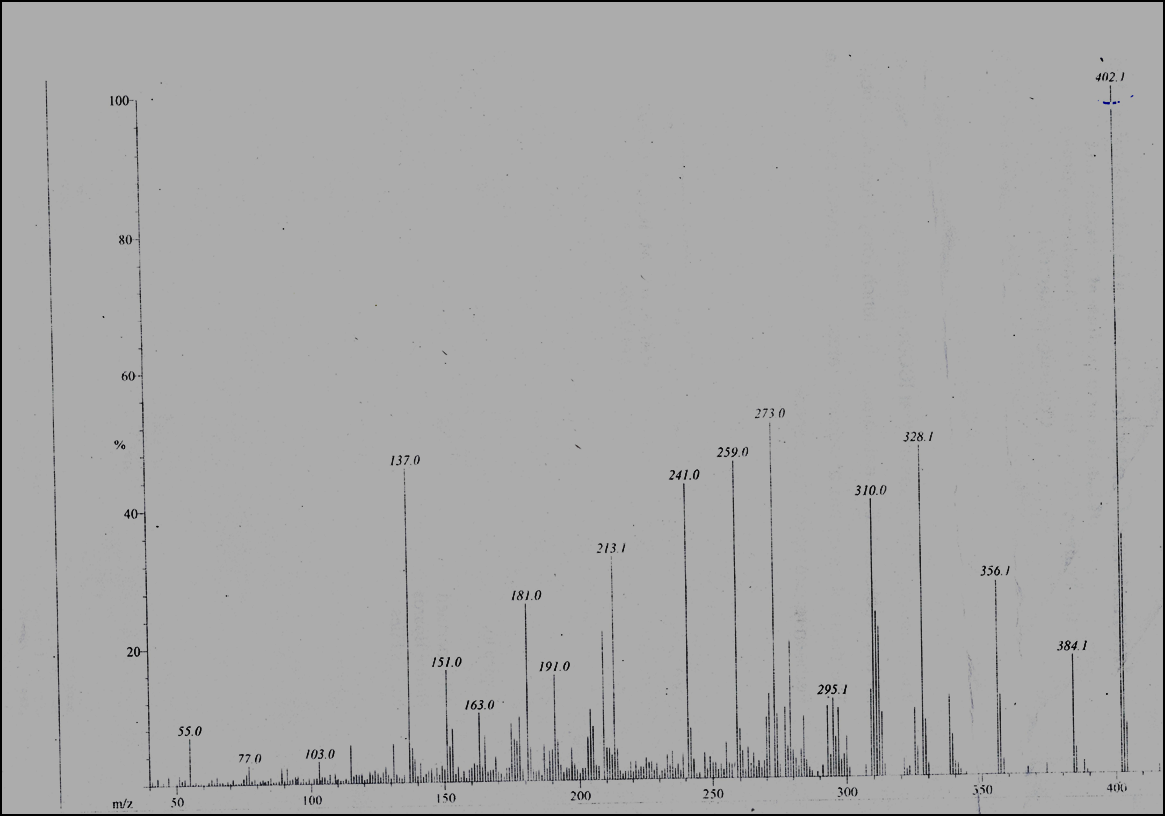


Figure-S10: EI-MS spectra of compound **3**


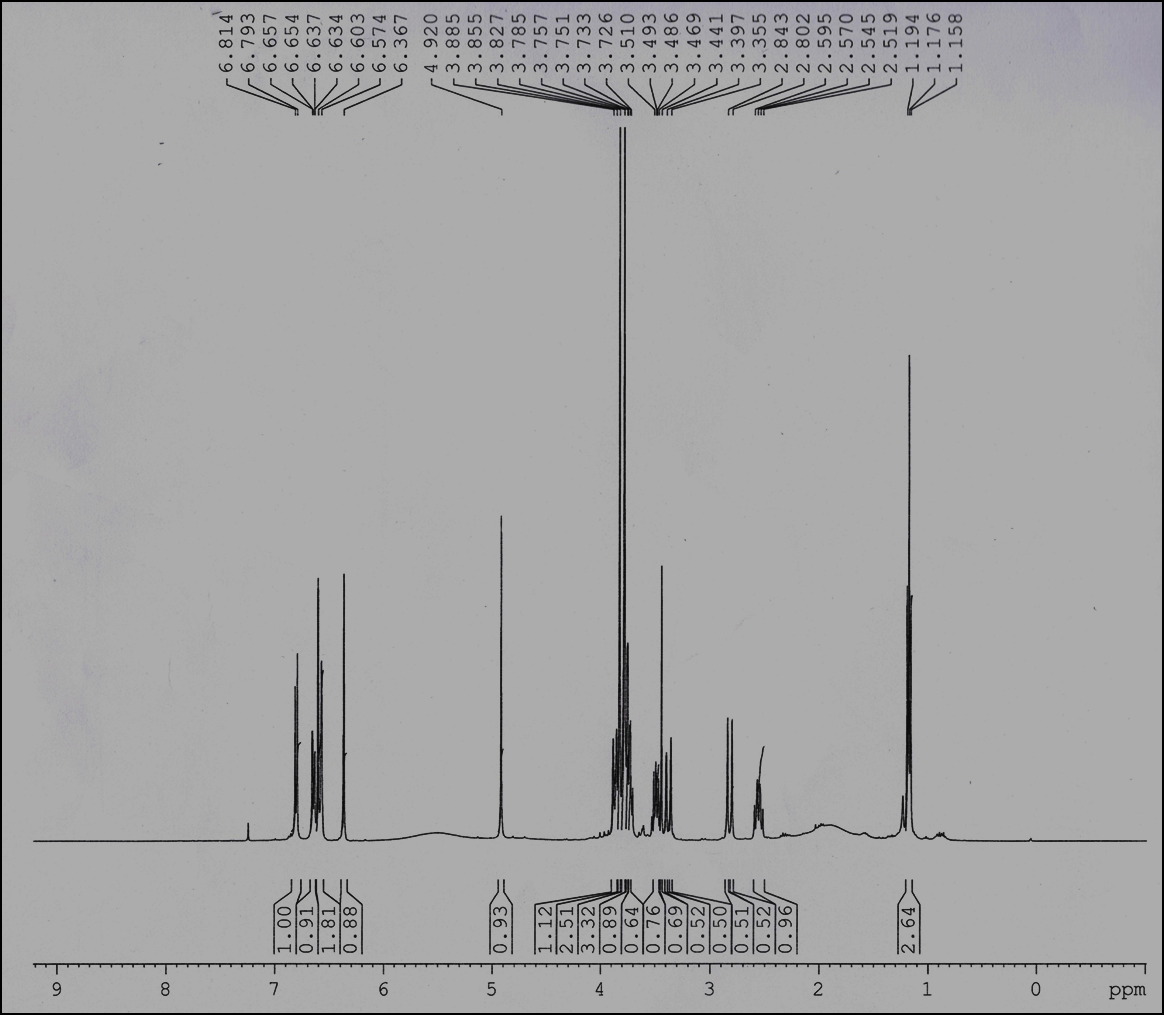


Figure-S11: 1H-NMR spectra of compound **3**
